# Supplementary material for: Examination of cobalt, nickel, copper and zinc(ii) complex geometry and binding affinity in aqueous media using simple pyridylsulfonamide ligandsElectronic supplementary information (ESI) available: experimental details for [M(L2)2], [M(L3)2] and [M(L4)2] (M = Zn, Cu, Ni, Co); species distribution plots. See http://www.rsc.org/suppdata/nj/b2/b206279h/
Source: Royal Society of Chemistry journal article supplement (doi:10.1039/b206279h), 2002-11-15
Supplement: b206279h.doc [file b206279h.doc]

### ESI:

### Experimental

*Zn(C7H6F3N2O2S)2***[Zn(L2)2]** 2-Trifluoromethanesulfonylaminomethylpyridine **L2** (75mg, 0.31mmol) and zinc acetate (34.2mg, 0.16mmol) were dissolved in methanol (10ml) and heated under reflux for 3 hours. The solution was allowed to cool to room temperature and left standing to evaporate slowly. On standing white crystals formed which were collected by filtration and washed with cold methanol, m.p. 260ºC (dec); 1H NMR (300MHz, CD3CN): H 4.78 (2H, s, CH2), 7.54 (1H, t, *J 6.6,* H5), 7.61 (1H, d, *J 7.8,* H3), 8.08 (1H, t of d, *J 1.8, 8.1*, H4), 8.47 (1H, d, *J 5.4*, H6); 13C NMR (65MHz, CD3CN): C 49.81 (CH2), 124.16 (C3 or C5), 124.71 (C3 or C5), 141.57 (C4), 148.14 (C6), 159.00 (q, C2); 19F NMR (188MHz, CD3CN): F -78.14 (s, CF3); m/z (ES­+): 580 (22%, ZnL2K), 564 (100%, ZnL2Na), 262 (28%, L + Na); max (KBr)/cm-1 1614 ( py), 1447 ( py), 1334 (a SO2), 1196 (s SO2), 1098 ( CH), 962, 603 ( NH); Found: C, 30.87; H. 2.15; N. 10.08. Zn(C7H6F3N2O2S)2 requires C. 30.92; H. 2.22; N. 10.30.

*Cu(C7H6F3N2O2S)2* **[Cu(L2)2]**  The copper (II) complex was prepared as described for the zinc analogue to yield blue crystals, m.p. 220-223ºC; m/z (ES­+): 579 (20%, CuL2K), 563 (100%, CuL2Na); max (KBr)/cm-1 1616 ( py), 1448 (ν py), 1364 ( NH), 1334 (a SO2), 1178 (s SO2), 1092 ( CH), 605 ( NH); max(MeCN) 672nm ( 227dm3mol-1cm-1); Found: C, 30.64; H. 2.28; N. 10.27. Cu(C7H6F3N2O2S)2 requires C. 31.02; H. 2.23; N. 10.34.

*Ni(C7H6F3N2O2S)2.2EtOH* **[Ni(L2)2]** 2-Trifluoromethanesulfonylaminomethylpyridine **L2** (60mg, 0.25mmol) and nickel acetate (31mg, 0.12 mmol) were dissolved in methanol to form a pale green solution which was heated under reflux with stirring for four hours. The solution was allowed to cool to room temperature and the solvent slowly evaporated yielding a green oil which was dissolved in ethanol. Pale blue crystals formed on standing for several days. The crystals were collected by filtration and washed with cold methanol. m.p. 120ºC (dec); m/z (ES­+): 558 (100%, NiL2Na); max (KBr)/cm-1 1609 ( py), 1444 ( py), 1305 (a SO2), 1182 (s SO2), 1084 ( CH), , 601 ( NH); max(MeCN)/nm 367 and 597 (/dm3mol-1cm-1 52 and 32); Found: C, 34.15; H. 3.82; N. 8.97*.* Ni(C7H6F3N2O2S)2.2EtOH requires C. 34.36; H. 3.84; N. 8.90.

*Co(C7H6F3N2O2S)2* **[Co(L2)2]** The cobalt (II) complexwas prepared as described for the nickel (II) analogue yielding deep pink crystals, m.p. 230ºC; m/z (ES­+): 575 (26%, CoL2K), 564 (100%, CoL2Na); max (KBr)/cm-1 1613 ( py), 1446 ( py), 1335 (a SO2), 1186 (s SO2), 1164 ( CH), 1095 ( CH), 948, 602 ( NH); max(MeCN) 500nm ( 46dm3mol-1cm-1); Found: C, 31.58; H, 2.28; N, 10.44. Co(C7H6F3N2O2S)2 requires C. 31.29; H. 2.25; N. 10.43.

*Zn(C8H8N2O2F3S)2* **[Zn(L3)2]** 2-Trifluoromethanesulfonylaminomethyl-6-methylpyridine **L3** (25mg, 0.0011mmol) and zinc acetate (12mg, 0.0005mmol) were dissolved in methanol (4ml). The resulting clear colourless solution was heated under reflux with stirring for four hours. After cooling to room temperature, colourless crystals formed on standing overnight. The crystals were collected by filtration and washed with cold methanol, m.p. 224-226ºC; 1H NMR (200MHz, CD3CN): H 2.43 (3H, s, CH3), 4.77 (2H, s, CH2), 7.44 (2H, t, *J 6.8*, H3, H5), 8.00 (1H, t, *J 7.8*, H4); 13C NMR (50.3MHz, CD3CN): C 23.87 (CH3), 49.77 (CH2), 121.58 (C3orC5), 124.81 (C3orC5), 142.06 (C4), 157.73 (q, C2), 158.36 (CF3). 19F NMR (188MHz, CD3CN): F –78.11 (s, CF3); m/z (ES­+): 608 (12%, ZnL2K+), 592 (100%, ZnL2Na+), 276 (34%, LNa); max (KBr)/cm-1 1611 ( py), 1472 ( py), 1335 (a SO2), 1194 (s SO2), 1168 ( CH), 1092 ( CH), 604 ( NH); Found: C, 33.48; H. 2.67; N. 9.69. Zn(C8H8N2O2F3S)2requires C. 33.61; H. 2.82; N. 9.80.

*Cu(C8H8N2O2F3S)2* **[Cu(L3)2]** The copper (II) complex was prepared as described for the zinc (II) analogue, yielding lime green crystals, m.p. 180ºC (dec); m/z (ES­+): 592 (24%, CuL2Na+), 276 (100%, LNa+); max (KBr)/cm-1 1611 ( py), 1472 ( py), 1340 ( py), 1324 (a SO2), 1186 (s SO2), 1167 ( CH), 1088 ( CH), 601 ( NH); max(MeCN) 410 and 764nm ( 404 and 74 dm3mol-1cm-1); Found: C, 33.53; H. 2.77; N. 9.60. Cu(C8H8N2O2F3S)2requires C. 33.71; H. 2.83; N. 9.83.

*Ni(C8H8N2O2F3S)2* **[Ni(L3)2]**, The nickel (II) complex wasprepared as above, yielding purple crystals, m.p. 235-238ºC; m/z (ES­+): 604 (18%, NiL2K), 587 (40%, NiL2Na), 276 (100%, LNa); max (KBr)/cm-1 1611 ( py), 1474 ( py), 1338 (a SO2), 1190 (s SO2), 1169 ( CH), 1094 ( CH), 605 ( NH); max(MeCN) 544 and 733 nm ( 190 and 51 dm3mol-1cm-1). The proposed constitution is in agreement with crystallographic data.

*Co(C8H8N2O2F3S)2* **[Co(L3)2]** The cobalt complex was prepared as above, yielding purple crystals, m.p. 200ºC (dec); m/z (ES­+): 588 (100%, CoL2Na+), 276 (41%, LNa+); max (KBr)/cm-1 1611 ( py), 1473 (v py), 1335 (a SO2), 1188 (s SO2), 1167 ( CH), 1090 ( CH), 605 ( NH); max(MeCN) 533 and 564nm ( 407 and 380 dm3mol-1cm-1); Found: C, 33.97; H. 2.84; N. 9.89. Co(C8H8N2O2F3S)2requires C. 33.99; H. 2.86; N. 9.91.

*Zn(C14H15N2O2S)2* **[Zn(L4)2]** 2*-p*-Toluenesulfonylaminomethyl-6-methylpyridine **L4** (500mg, 18mmol) and zinc acetate (190mg, 9mmol) were dissolved in methanol (35ml), and the resulting clear solution was heated under reflux for 18 hours. The solution was allowed to cool to room temperature. On standing a white oil formed. This was crystallised from ethanol. The resulting white crytals were collected by filtration and washed with cold methanol. m.p. 220ºC (dec); 1H NMR (200MHz, CD3OD): H 2.36 (6H, s, 2CH3), 2.41 (6H, s, 2CH3), 4.47 (4H, s, broad*,* 2CH2), 7.32 (4H, d, *J 8,* 2H3’, 2H5’), 7.35 (4H, d, *J 7.6,* 2H2’, 2H5’); 7.81 (4H, d, *J 8.2,* 2H3, 2H5), 7.88 (2H, t, *J 7.8,* 2H4); 13C NMR (50.3MHz, CD3OD): c 21.37 (Me), 23.79 (Me), 121.94 (C4’), 124.91 (C1’), 128.29 (C3’+ C5’), 130.39 (C2’+C6’), 140.40 (q, C6), 141.92 (C2), 143.24 (C3), 158.37 (C4), 159.86 (C2); *m/z* (ESMS): 615 (20%, ZnL2), 637 (100%, ZnL2Na); max (KBr)/cm-1 1607 ( py), 1577 ( py), 1448 ( py), 1266(a SO2), 1149 (s SO2), 1095 ( CH), 1085 ( CH), 974, 788 ( py), 669 ( NH), 557 ( SO2); Found: C, 54.49; H, 4.86; N,9.07*.* Zn(C14H15N2O2S)2 requires C, 54.59; H, 4.91; N, 9.09.

*Cu(C14H15N2O2S)2* **[Cu(L4)2]** 2*-p*-Toluenesulfonylaminomethyl-6-methylpyridine **L4** (50mg, 0.18mmol) and copper acetate (18mg, 0.09mmol) were dissolved in methanol (10ml) and heated under reflux for 15 hours. The resulting brown solution was allowed to cool to room temperature. On standing a brown oil formed, this was resrystallised from methanol to yield brown crystals which were collected by filtration and washed with cold methanol. m.p. 220ºC(dec); *m/z*  (FAB): 614 (46%, CuL2),; max (KBr)/cm-1 1607 ( py), 1576 ( py), 1441 ( py), 1274 (a SO2), 1142 (s SO2), 1084 ( CH), 958, 927 ( py), 669 ( NH), 555 ( SO2); max(MeCN) 448, 784nm ( 2017, 215 dm3mol-1cm-1); Found: C, 54.79; H, 5.13; N, 8.84*.* Cu(C13H13N2O2S)2 requires C, 54.75; H, 4.92; N, 9.12.

*Ni(C14H15N2O2S)2***[Ni(L4)2]** 2*-p*-Toluenesulfonylaminomethyl-6-methylpyridine **L4** (50mg, 0.18mmol) and nickel acetate (22mg, 0.09mmol) were dissolved in methanol (10ml). The resulting clear pink solution was heated under reflux with stirring for eight hours. The solution was allowed to cool to room temperature and left standing, a purple-brown oil formed. This was crystallised from ethanol to form purple crystals which were collected by filtration and washed with cold methanol and water, m.p. 220ºC (dec); max (KBr)/cm-1 1599 ( py), 1458 ( py), 1324 (a SO2), 1160 (s SO2), 1091 ( CH), 662 ( NH), 551 ( SO2);  max(MeCN) 544, 760nm ( 71, 30 dm3mol-1cm-1); Found: C, 55.01; H,4.77 ; N, 8.79*.* Ni(C13H13N2O2S)2 requires C, 55.19; H, 4.96; N, 9.19.

*Co(C14H15N2O2S)2***[Co(L4)2]** 2*-p*-Toluenesulfonylaminomethyl-6-methylpyridine **L4** (50mg, 0.18mmol) and cobaltous acetate hexahydrate (22mg, 0.09mmol) were dissolved in methanol (10ml). The resulting purple solution was heated under reflux with stirring for eight hours. The solution was allowed to cool to room temperature. On standing a pink oil formed. This was recrystallised from ethanol to yield purple crystals. These were collected by filtration and washed with cold methanol, m.p. 240ºC (dec); max (KBr)/cm-1 1610 ( py), 1444 ( py), 1335 (a SO2), 1166 (s SO2), 1090 ( CH), 958, 789 ( py), 643 ( NH), 573 ( SO2); max(MeCN)/nm 532 and 564 (/dm3mol-1cm-1 576 and 536); Found: C, 55.33; H, 5.12; N,8.90*.*  Co(C13H13N2O2S)2 requires C, 55.17; H, 4.96; N, 9.19.
